# Supplementary material for: Bacterial Communities of the Canola Rhizosphere: Network Analysis Reveals a Core Bacterium Shaping Microbial Interactions
Source: Front Microbiol. 2020 Jul 10;11:1587. doi: 10.3389/fmicb.2020.01587 (PMC7418181; doi:10.3389/fmicb.2020.01587)
Supplement: Supplementary file 5 [file Table_1.XLSX]

## Sheet: network 2013 default node
Table S1 : Taxonomic affiliations of the members of 2013 prokaryotic network of canola rhizosophere according to RDP classifier on SILVA database.
ID	Kingdom	Phylum	Class	Order	Family	Genus	Species
ASV1	Bacteria	Actinobacteria	Actinobacteria	Micrococcales	Micrococcaceae	Pseudarthrobacter	NA
ASV2	Bacteria	Proteobacteria	Gammaproteobacteria	Enterobacteriales	Enterobacteriaceae	Yersinia	NA
ASV3	Archaea	Thaumarchaeota	Nitrososphaeria	Nitrososphaerales	Nitrososphaeraceae	NA	NA
ASV4	Bacteria	Proteobacteria	Gammaproteobacteria	Xanthomonadales	Xanthomonadaceae	Stenotrophomonas	NA
ASV5	Bacteria	Chloroflexi	Chloroflexia	Thermomicrobiales	JG30-KF-CM45	NA	NA
ASV6	Bacteria	Chloroflexi	KD4-96	NA	NA	NA	NA
ASV8	Bacteria	Chloroflexi	Gitt-GS-136	NA	NA	NA	NA
ASV9	Bacteria	Actinobacteria	Actinobacteria	Frankiales	Geodermatophilaceae	Blastococcus	NA
ASV10	Bacteria	Acidobacteria	Subgroup_6	NA	NA	NA	NA
ASV11	Bacteria	Proteobacteria	Gammaproteobacteria	Xanthomonadales	Xanthomonadaceae	Stenotrophomonas	NA
ASV12	Bacteria	Acidobacteria	Subgroup_6	NA	NA	NA	NA
ASV14	Bacteria	Acidobacteria	Subgroup_6	NA	NA	NA	NA
ASV16	Bacteria	Actinobacteria	Actinobacteria	Micrococcales	Intrasporangiaceae	NA	NA
ASV17	Bacteria	Proteobacteria	Gammaproteobacteria	Xanthomonadales	Xanthomonadaceae	Thermomonas	NA
ASV18	Bacteria	Acidobacteria	Blastocatellia_(Subgroup_4)	Pyrinomonadales	Pyrinomonadaceae	RB41	NA
ASV20	Bacteria	Acidobacteria	Subgroup_6	NA	NA	NA	NA
ASV21	Bacteria	Proteobacteria	Gammaproteobacteria	Xanthomonadales	Xanthomonadaceae	Arenimonas	NA
ASV22	Bacteria	Actinobacteria	MB-A2-108	NA	NA	NA	NA
ASV25	Archaea	Thaumarchaeota	Nitrososphaeria	Nitrososphaerales	Nitrososphaeraceae	Candidatus_Nitrocosmicus	NA
ASV27	Bacteria	Bacteroidetes	Bacteroidia	Sphingobacteriales	Sphingobacteriaceae	Sphingobacterium	NA
ASV29	Bacteria	Proteobacteria	Gammaproteobacteria	Xanthomonadales	Xanthomonadaceae	NA	NA
ASV31	Bacteria	Chloroflexi	KD4-96	NA	NA	NA	NA
ASV32	Bacteria	Actinobacteria	Actinobacteria	Micrococcales	Intrasporangiaceae	NA	NA
ASV37	Bacteria	Proteobacteria	Gammaproteobacteria	Pseudomonadales	Moraxellaceae	Acinetobacter	NA
ASV38	Bacteria	Actinobacteria	Thermoleophilia	Gaiellales	Gaiellaceae	Gaiella	NA
ASV39	Bacteria	Proteobacteria	Gammaproteobacteria	Betaproteobacteriales	Burkholderiaceae	NA	NA
ASV40	Bacteria	Planctomycetes	Phycisphaerae	Tepidisphaerales	WD2101_soil_group	NA	NA
ASV41	Bacteria	Proteobacteria	Gammaproteobacteria	Betaproteobacteriales	Burkholderiaceae	Variovorax	NA
ASV54	Bacteria	Actinobacteria	Thermoleophilia	Gaiellales	NA	NA	NA
ASV57	Bacteria	Acidobacteria	Subgroup_6	NA	NA	NA	NA
ASV69	Bacteria	Proteobacteria	Gammaproteobacteria	PLTA13	NA	NA	NA
ASV70	Bacteria	Actinobacteria	Actinobacteria	Propionibacteriales	Nocardioidaceae	Nocardioides	NA
ASV71	Bacteria	Actinobacteria	Actinobacteria	Micrococcales	Micrococcaceae	Paenarthrobacter	NA
ASV89	Bacteria	Bacteroidetes	Bacteroidia	Chitinophagales	Chitinophagaceae	NA	NA
ASV90	Bacteria	Acidobacteria	Blastocatellia_(Subgroup_4)	Pyrinomonadales	Pyrinomonadaceae	RB41	NA
ASV97	Bacteria	Verrucomicrobia	Verrucomicrobiae	Pedosphaerales	Pedosphaeraceae	NA	NA
ASV113	Bacteria	Proteobacteria	Gammaproteobacteria	Betaproteobacteriales	SC-I-84	NA	NA
ASV119	Bacteria	Chloroflexi	Chloroflexia	Thermomicrobiales	JG30-KF-CM45	NA	NA
ASV121	Bacteria	Latescibacteria	NA	NA	NA	NA	NA
ASV129	Bacteria	Proteobacteria	Gammaproteobacteria	Steroidobacterales	Steroidobacteraceae	NA	NA
ASV132	Bacteria	Proteobacteria	Alphaproteobacteria	Rhizobiales	Beijerinckiaceae	NA	NA
ASV143	Bacteria	Acidobacteria	Subgroup_6	NA	NA	NA	NA
ASV149	Bacteria	Acidobacteria	Blastocatellia_(Subgroup_4)	Blastocatellales	Blastocatellaceae	Stenotrophobacter	NA
ASV160	Bacteria	Bacteroidetes	Bacteroidia	Chitinophagales	Chitinophagaceae	NA	NA
ASV180	Bacteria	Actinobacteria	Actinobacteria	Micrococcales	Cellulomonadaceae	Cellulomonas	NA
ASV204	Bacteria	Acidobacteria	Acidobacteriia	Solibacterales	Solibacteraceae_(Subgroup_3)	Bryobacter	NA
ASV232	Bacteria	Proteobacteria	Alphaproteobacteria	Sphingomonadales	Sphingomonadaceae	Sphingopyxis	NA
